# Supplementary material for: Caffeine intake antagonizes salt sensitive hypertension through improvement of renal sodium handling
Source: PubMed Central journal article supplement (PMC4866033; doi:10.1038/srep25746), 2016-05-12

# **Caffeine intake antagonizes salt sensitive hypertension through improvement of renal sodium handling**

## **Supplementary Information**

Hao Yu<sup>#</sup>, Tao Yang<sup>#</sup>, Peng Gao, Xing Wei, Hexuan Zhang, Shiqiang Xiong, Zongshi Lu, Li Li, Xiao Wei, Jing Chen, Yu Zhao, William J. Arendshorst, Qianhui Shang<sup>\*</sup>, Daoyan Liu, Zhiming Zhu<sup>\*</sup>

<sup>#</sup>Authorship Note: Hao Yu and Tao Yang contributed equally to this work.

<sup>\*</sup>Corresponding author: Zhiming Zhu and Qianhui Shang,  
E-mail: zhuzm@yahoo.com or qhshang60@126.com  
Phone numbers: +86-23-68767849      Fax numbers: +86-23-68705094

# Supplementary Figure 1.

Original Western Blot figures in Figure 4a. Black arrowhead indicates the target band of antibody which is presented in manuscript.

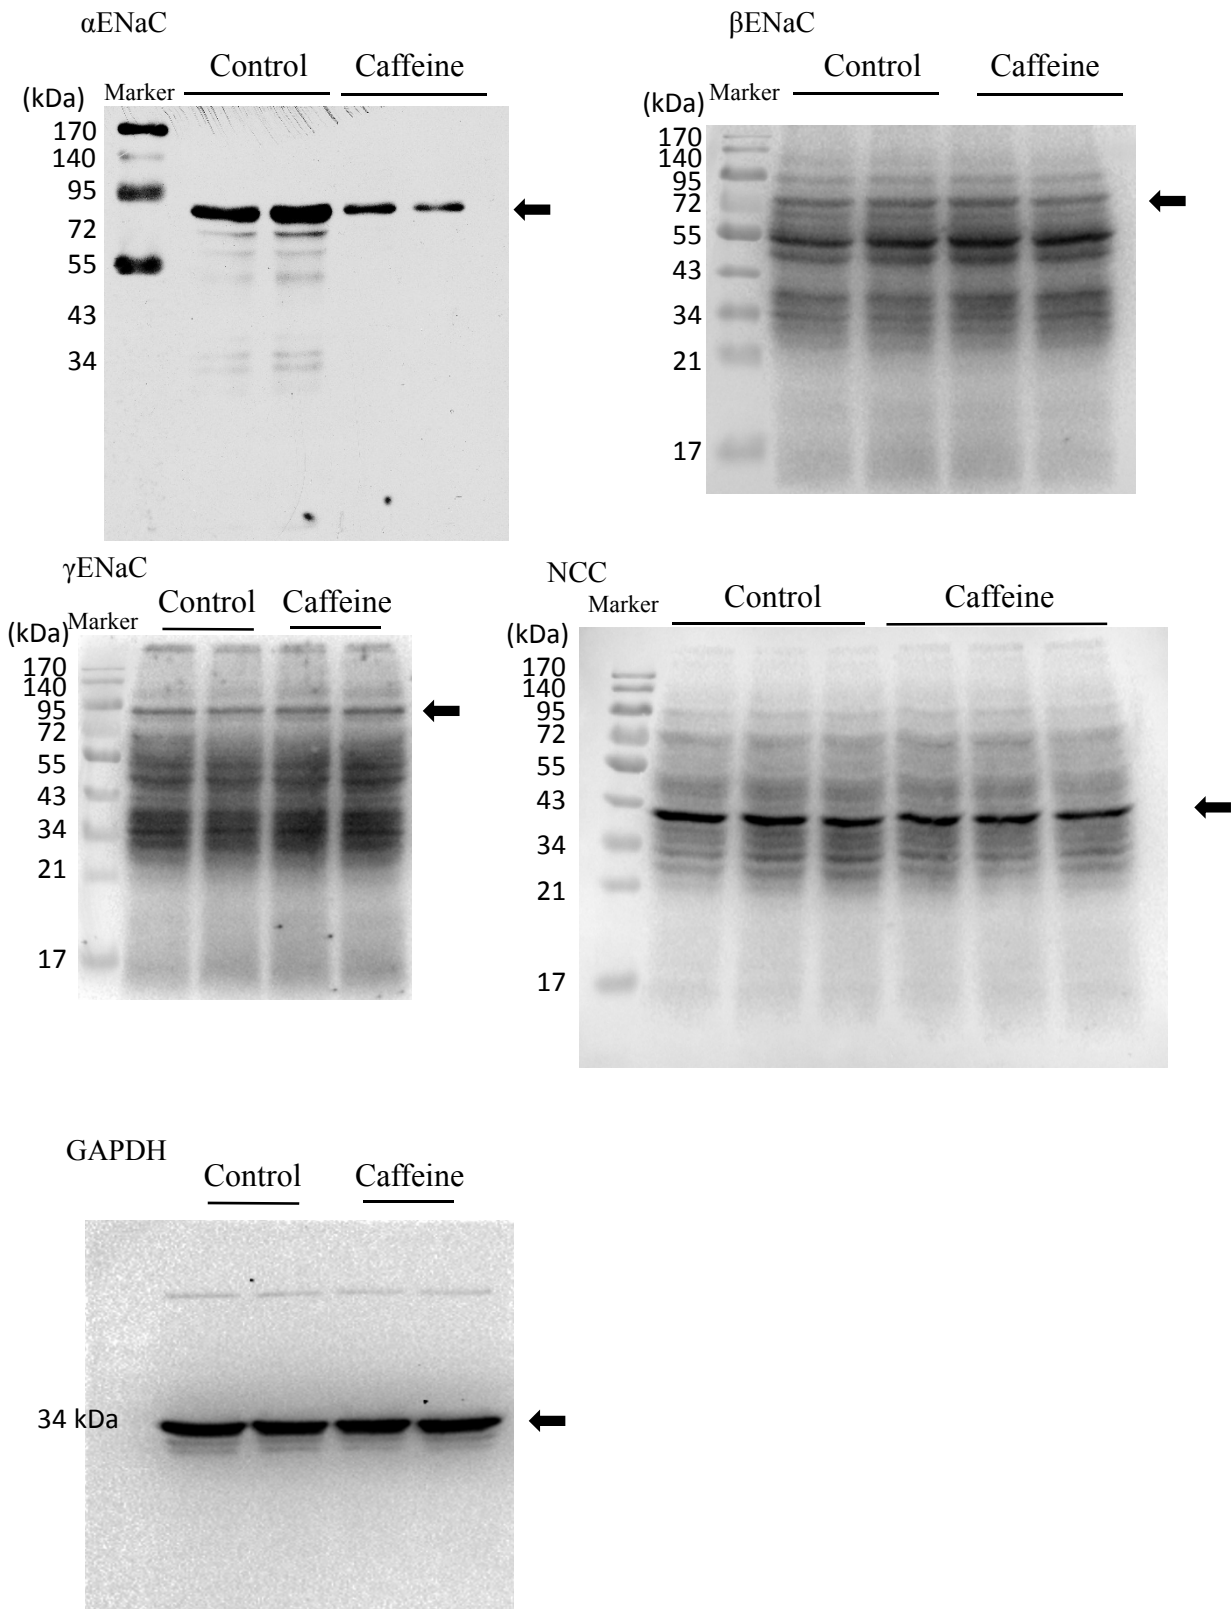

## Supplementary Figure 2

Original Western Blot figures in Figures 5a and 5b. Black arrowhead indicates the target band of antibody which is presented in manuscript.

(a)

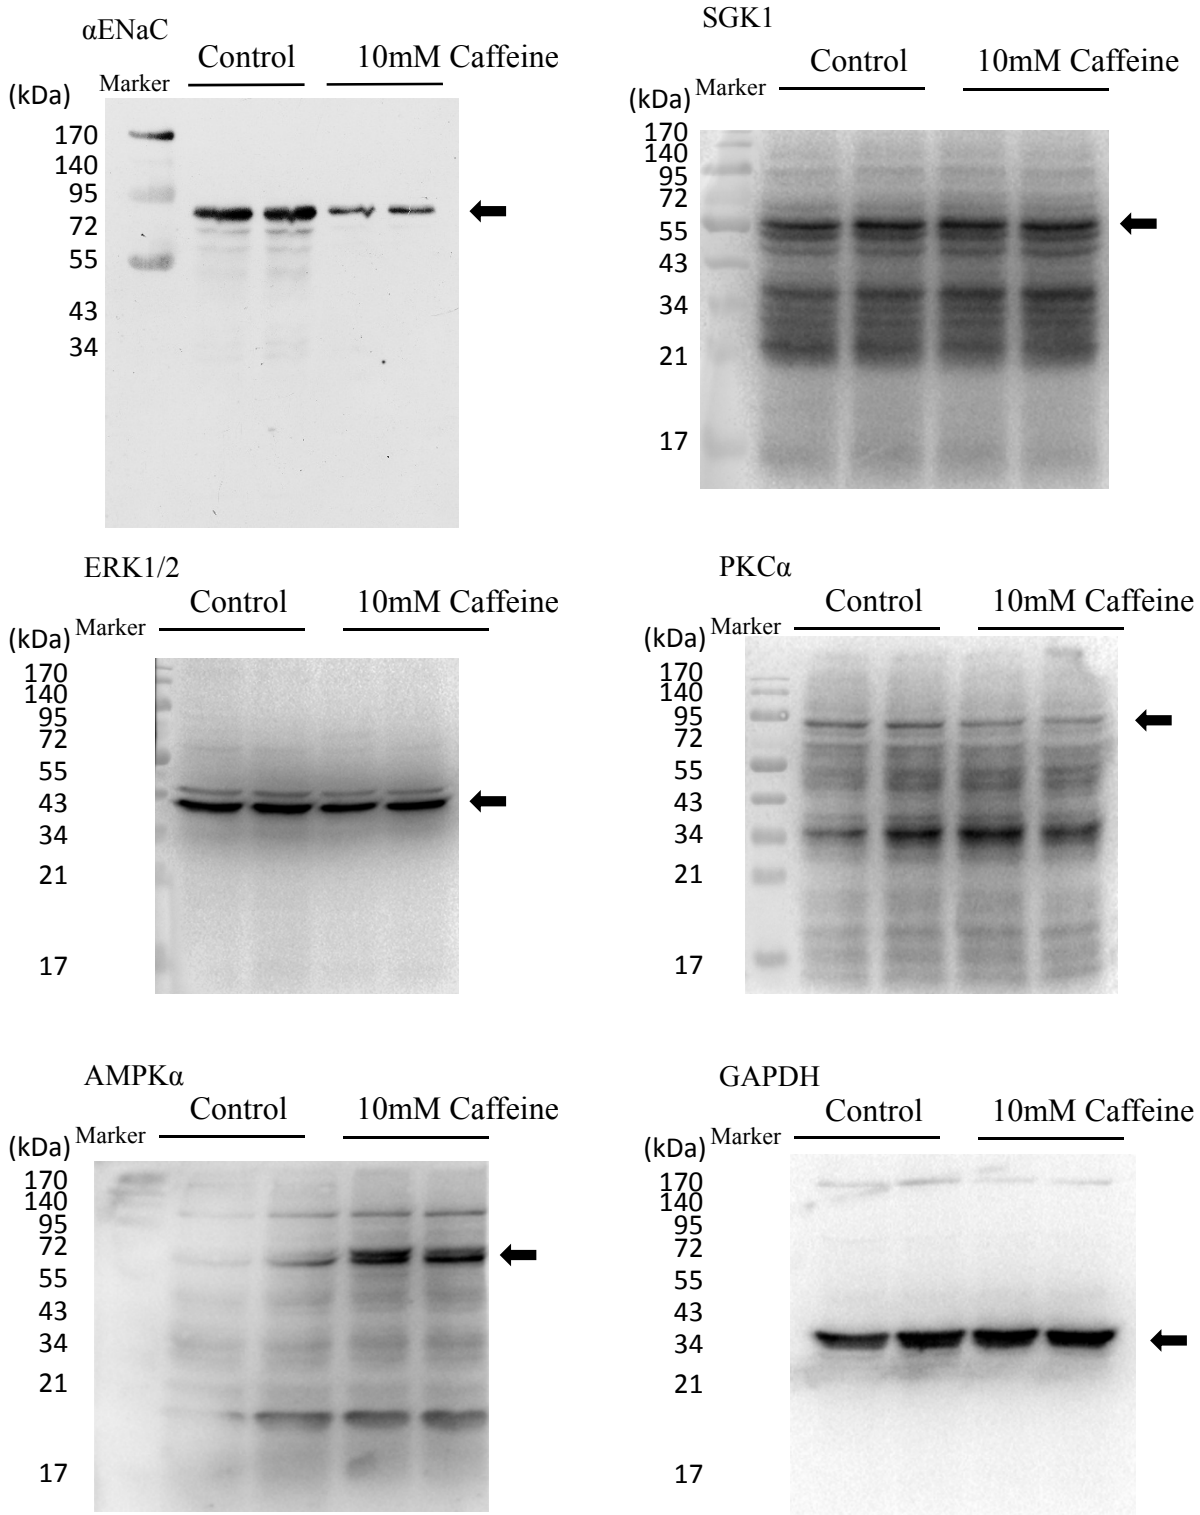

## Supplemental Figure 2

(b)

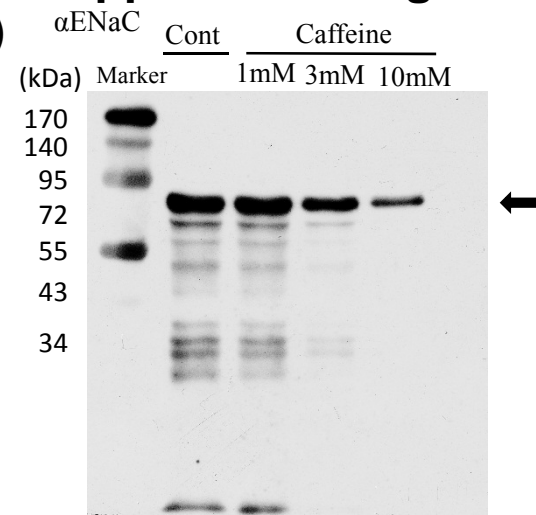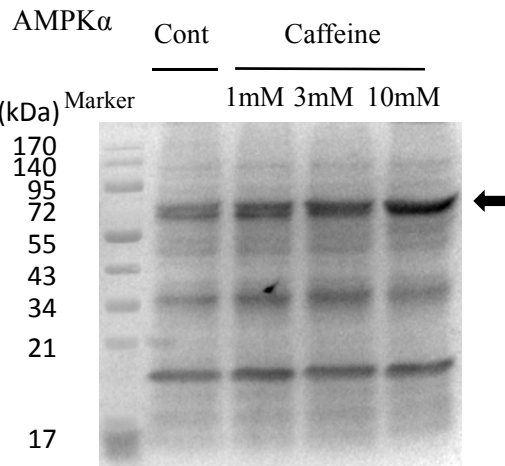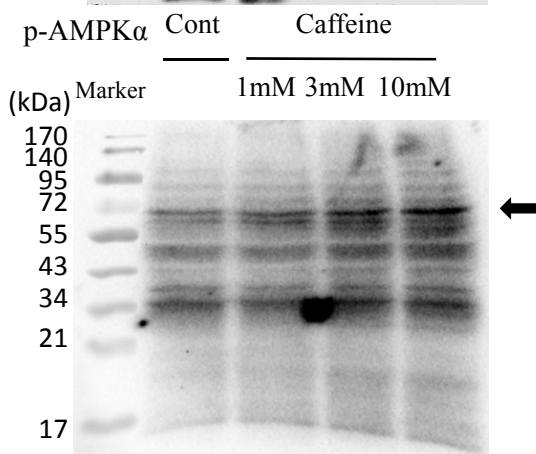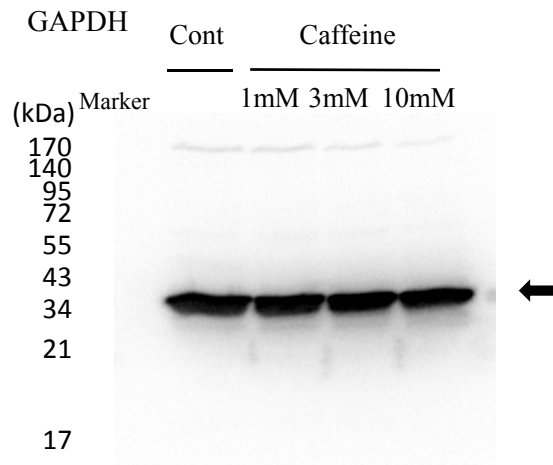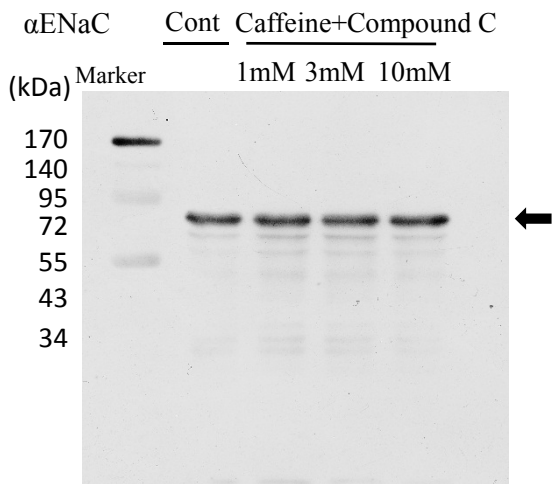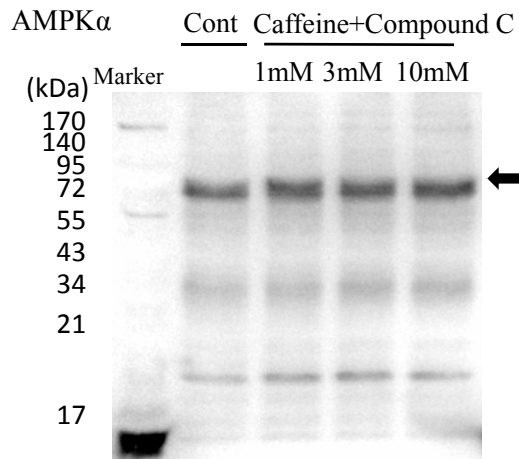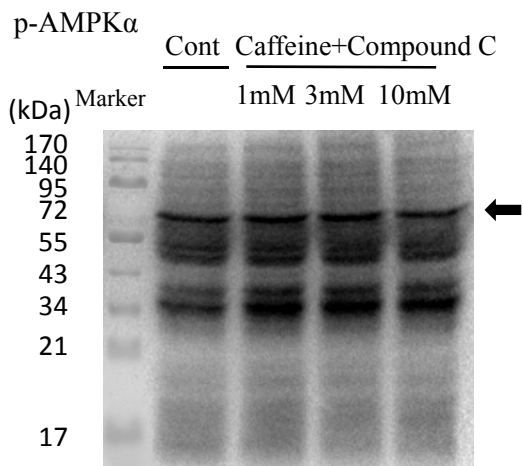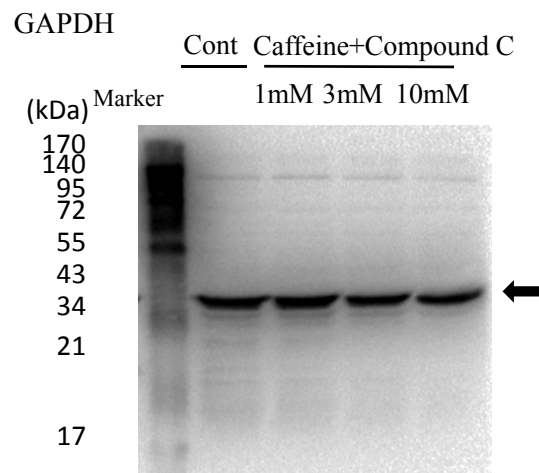

Supplement: srep25746-s1.pdf [file srep25746-s1.pdf]
